# Supplementary material for: A CH2Cl2 complex of a [Rh(pincer)]+ cation
Source: Royal Society of Chemistry journal article supplement (doi:10.1039/c5dt00481k), 2015-01-01
Supplement: c5dt00481k1.pdf [file c5dt00481k1.pdf]

Supporting information for:

## **A CH<sub>2</sub>Cl<sub>2</sub> Complex of a [Rh(pincer)]<sup>+</sup> Cation**

Gemma M. Adams, F. Mark Chadwick, Sebastian D. Pike

and Andrew S. Weller\*

*Department of Chemistry, Chemistry Research Laboratories, University of Oxford,*

*Mansfield Road, Oxford, OX1 3TA, United Kingdom.*

|                        |            |
|------------------------|------------|
| <b>Experimental</b>    | <b>S-2</b> |
| <b>Crystallography</b> | <b>S-5</b> |
| <b>References</b>      | <b>S-8</b> |

## Experimental

All manipulations, unless otherwise stated, were performed under an argon atmosphere using standard Schlenk line and glove-box techniques. Glassware was oven dried at 130°C overnight and flamed under vacuum prior to use. CH<sub>2</sub>Cl<sub>2</sub> and pentane were dried using a Grubbs-type solvent purification system (MBraun SPS-800) and degassed by three successive freeze-pump-thaw cycles.<sup>1</sup> CD<sub>2</sub>Cl<sub>2</sub> and 1,2-C<sub>6</sub>H<sub>4</sub>F<sub>2</sub> (pre-treated with alumina) were dried over CaH<sub>2</sub>, vacuum distilled and stored over 3 Å molecular sieves. Na[BAR<sup>F</sup><sub>4</sub>],<sup>2</sup> Rh(<sup>t</sup>BuPNP)Cl,<sup>3</sup> and Rh(<sup>t</sup>BuPONOP)Cl (**1**),<sup>4</sup> were prepared by literature methods. NMR spectra were recorded on a Bruker Avance III 500 MHz NMR spectrometer or a Bruker Avance III HD nanobay 400 MHz NMR spectrometer at room temperature. Residual protio solvent was used as reference for <sup>1</sup>H spectra in deuterated solvent samples. When in 1,2-C<sub>6</sub>H<sub>4</sub>F<sub>2</sub> solvent, <sup>1</sup>H NMR spectra were pre-locked to a sample of C<sub>6</sub>D<sub>6</sub> (25%) and 1,2-C<sub>6</sub>H<sub>4</sub>F<sub>2</sub> (75%), and referenced to the centre of the downfield solvent multiplet ( $\delta = 7.07$ ). <sup>31</sup>P NMR spectra were externally referenced to 85% H<sub>3</sub>PO<sub>4</sub>. All chemical shifts ( $\delta$ ) are quoted in ppm and coupling constants (*J*) in Hz. ESI-MS were recorded on a Bruker micrOTOF instrument interfaced with a glove-box.<sup>5</sup> Elemental microanalyses were performed by Stephen Boyer at London Metropolitan University. Fourier Transform Infrared Spectroscopy samples were made using a custom-built cell and spectra were measured using a Thermo-Scientific Nicolet iS5 with an iD1 transmission attachment.

### Formation of [Rh(<sup>t</sup>BuPONOP)( $\kappa^1$ -ClCH<sub>2</sub>Cl)][BAR<sup>F</sup><sub>4</sub>] (**2**)

To a J. Young flask charged with **1** (30 mg, 0.055 mmol) and Na[BAR<sup>F</sup><sub>4</sub>] (49.5 mg, 0.055 mmol), CH<sub>2</sub>Cl<sub>2</sub> (1 mL) was added. Immediately, the dark orange solution turned orange/yellow and a precipitate formed (assumed to be NaCl). The solution was filtered and the solvent removed *in vacuo* yielding a light orange powder (61.2 mg, 81% yield). A CH<sub>2</sub>Cl<sub>2</sub> solution of **2** layered with pentane at 298 K yields light orange crystals suitable for X-ray crystallography – however <sup>31</sup>P NMR spectroscopy of the bulk crystallised sample indicated the formation of the corresponding  $\kappa^1$ -N<sub>2</sub> complex (**3**), as well as **2**, in an

approximate 1:1 ratio. Complex **3** was confirmed *via* an independent synthetic route. Crystal picking allowed for single crystal diffraction data of the appropriate CH<sub>2</sub>Cl<sub>2</sub> complex to be obtained. **2** was found to be stable in powder form and in CH<sub>2</sub>Cl<sub>2</sub> solvent, enabling further reactivity.

**<sup>1</sup>H NMR (CD<sub>2</sub>Cl<sub>2</sub>, 400 MHz):** δ 7.76 – 7.72 (obscured t, 1H, C<sub>5</sub>H<sub>3</sub>N), 7.72 (br, 8H, BAr<sup>F</sup>), 7.56 (br, 4H, BAr<sup>F</sup>), 6.73 (d, <sup>3</sup>J<sub>HH</sub> = 8.2 Hz, 2H, C<sub>5</sub>H<sub>3</sub>N), 1.44 (app t, J<sub>PH</sub> = 7.7 Hz, 36H, <sup>t</sup>Bu)

**<sup>31</sup>P{<sup>1</sup>H} NMR (CD<sub>2</sub>Cl<sub>2</sub>, 202 MHz):** δ 204.5 (d, <sup>1</sup>J<sub>RhP</sub> = 136 Hz, P<sup>t</sup>Bu<sub>2</sub>)

**ESI-MS (1,2-C<sub>6</sub>H<sub>4</sub>F<sub>2</sub>, 60°C, 4.5 kV):** Only the corresponding κ<sup>1</sup>-N<sub>2</sub> complex (**3**) is found due to the presence of N<sub>2</sub> in the flow gas.<sup>6</sup>

**Elemental Microanalysis:** Calc. C<sub>54</sub>H<sub>53</sub>BCl<sub>2</sub>F<sub>24</sub>NO<sub>2</sub>P<sub>2</sub>Rh (1450.55 gmol<sup>-1</sup>): C, 44.71; H, 3.68; N, 0.97. Found: C, 44.85; H, 3.55; N, 1.09.

#### **Formation of [Rh(<sup>t</sup>BuPONOP)(κ<sup>1</sup>-N<sub>2</sub>)] [BAr<sup>F</sup><sub>4</sub>] (**3**)**

A J. Young NMR tube containing a solution of **2** (30 mg, 0.022 mmol) in 0.5 mL CH<sub>2</sub>Cl<sub>2</sub> was freeze-pump-thaw degassed three times before 1 atm N<sub>2</sub> was added to the system. After 30 minutes, the solvent was removed *in vacuo* and an isolated yield of 15 mg of **3** was obtained (52%). Layering a CH<sub>2</sub>Cl<sub>2</sub> solution of **3** with pentane at 298 K under an argon atmosphere produced orange/brown crystals suitable for single crystal X-ray diffraction.

**<sup>1</sup>H NMR (CD<sub>2</sub>Cl<sub>2</sub>, 500 MHz):** δ 7.81 (t, <sup>3</sup>J<sub>HH</sub> = 8 Hz, 1H, C<sub>5</sub>H<sub>3</sub>N), 7.72 (br, 8H, BAr<sup>F</sup>), 7.55 (br, 4H, BAr<sup>F</sup>), 6.82 (d, <sup>3</sup>J<sub>HH</sub> = 8 Hz, 2H, C<sub>5</sub>H<sub>3</sub>N), 1.44 (app t, J<sub>PH</sub> = 8 Hz, 36H, <sup>t</sup>Bu)

**<sup>31</sup>P{<sup>1</sup>H} NMR (CD<sub>2</sub>Cl<sub>2</sub>, 202 MHz):** δ 211.0 (d, <sup>1</sup>J<sub>RhP</sub> = 132 Hz, P<sup>t</sup>Bu<sub>2</sub>)

**IR ν(ATR; cm<sup>-1</sup>):** 2201.9 (s, N<sub>2</sub>)

**ESI-MS (1,2-C<sub>6</sub>H<sub>4</sub>F<sub>2</sub>, 60°C, 4.5 kV):** *m/z* = 530.16 [M]<sup>+</sup> (calc. 530.16)

**Elemental Microanalysis:** Calc. C<sub>53</sub>H<sub>51</sub>BF<sub>24</sub>N<sub>3</sub>O<sub>2</sub>P<sub>2</sub>Rh (1393.63 gmol<sup>-1</sup>): C, 45.68; H, 3.69; N, 3.02. Found: C, 45.61; H, 3.74; N, 2.97.

#### Formation of [Rh(<sup>t</sup>BuPONOP)(CO)][BAr<sup>F</sup><sub>4</sub>] (**4**)

**4** was formed using a method similar to that employed for **3**, with the substitution of CO for N<sub>2</sub> gas. The light orange solution turned bright yellow immediately after addition of 1 atm CO, indicating the reaction occurring instantly. An isolated yield of 17 mg of **4** was obtained (59%). Layering a CH<sub>2</sub>Cl<sub>2</sub> solution of **4** with pentane at 298 K under an argon atmosphere formed yellow needles suitable for single crystal X-ray diffraction.

**<sup>1</sup>H NMR (CD<sub>2</sub>Cl<sub>2</sub>, 500 MHz):** δ 7.91 (t, <sup>3</sup>J<sub>HH</sub> = 8.1 Hz, 1H, C<sub>5</sub>H<sub>3</sub>N), 7.73 (br, 8H, BAr<sup>F</sup>), 7.56 (br, 4H, BAr<sup>F</sup>), 6.92 (d, <sup>3</sup>J<sub>HH</sub> = 8.1 Hz, 2H, C<sub>5</sub>H<sub>3</sub>N), 1.41 (app t, J<sub>PH</sub> = 8.3 Hz, 36H, <sup>t</sup>Bu)

**<sup>31</sup>P{<sup>1</sup>H} NMR (CD<sub>2</sub>Cl<sub>2</sub>, 202 MHz):** δ 219.8 (d, <sup>1</sup>J<sub>RhP</sub> = 127 Hz, P<sup>t</sup>Bu<sub>2</sub>)

**IR ν(ATR; cm<sup>-1</sup>):** 2019.8 (s, CO)

**ESI-MS (C<sub>6</sub>H<sub>5</sub>F, 60°C, 4.5 kV):** *m/z* = 530.14 [M]<sup>+</sup> (calc. 530.15)

**Elemental Microanalysis:** Calc. C<sub>54</sub>H<sub>51</sub>BF<sub>24</sub>NO<sub>3</sub>P<sub>2</sub>Rh (1393.63 gmol<sup>-1</sup>): C, 46.54; H, 3.69; N, 1.01. Found: C, 46.68; H, 3.58; N, 1.08.

#### Formation of [Rh(<sup>t</sup>BuPNP)(CH<sub>2</sub>Cl)Cl][BAr<sup>F</sup><sub>4</sub>] (**5**)

To a J. Young flask charged with Rh(<sup>t</sup>BuPNP)Cl (30 mg, 0.056 mmol) and Na[BAr<sup>F</sup><sub>4</sub>] (49.8 mg, 0.056 mmol), CH<sub>2</sub>Cl<sub>2</sub> (1 mL) was added. After 12 h stirring, the red solution had turned green and a precipitate formed (assumed to be NaCl). The solution was filtered and layered with pentane at 298 K yielding green crystals suitable for X-ray crystallography. <sup>31</sup>P NMR spectroscopy data of the crystals indicated several phosphorus environments, all showing coupling to rhodium (<sup>1</sup>J<sub>RhP</sub> = 97 – 122 Hz), and repeating the experiment shows varying proportions of these species. <sup>1</sup>H NMR spectroscopy data indicated that some ligand reactivity may occur (hence the lower than expected integral value for the <sup>t</sup>Bu<sub>2</sub> groups in the <sup>1</sup>H NMR spectrum). In accordance with the X-ray diffraction data obtained it is proposed that two of these species are **5** and another Rh<sup>III</sup> species, [Rh(<sup>t</sup>BuPNP)(H)Cl][BAr<sup>F</sup><sub>4</sub>] (**6**), both of which are postulated to be products from C–Cl activation of the CH<sub>2</sub>Cl<sub>2</sub> solvent. The X-ray

crystallography data additionally shows that there is an approximate 50:50 ratio of **5:6** in the crystalline lattice.

**<sup>1</sup>H NMR (CD<sub>2</sub>Cl<sub>2</sub>, 400 MHz):** *Mixture of products.* δ 8.11 – 6.42 (br, 3H, C<sub>5</sub>H<sub>3</sub>N), 7.70 (br, 8H, BAr<sup>F</sup>), 7.51 (br, 4H, BAr<sup>F</sup>), 4.21 – 3.19 (br, 4H, PCH<sub>2</sub>), 2.12 – 0.93 (br, 31H, <sup>t</sup>Bu), –15.48 (br, 0.5H, RhH)

**<sup>31</sup>P{<sup>1</sup>H} NMR (CD<sub>2</sub>Cl<sub>2</sub>, 202 MHz):** *Major signals given.* δ 47.0 (d, <sup>1</sup>J<sub>RhP</sub> = 100 Hz, P<sup>t</sup>Bu<sub>2</sub>), 40.2 (d, <sup>1</sup>J<sub>RhP</sub> = 97 Hz, P<sup>t</sup>Bu<sub>2</sub>)

### Formation of [Rh(<sup>t</sup>BuPONOP)(η<sup>2</sup>-H<sub>2</sub>)] [BAr<sup>F</sup><sub>4</sub>]

Rh(<sup>t</sup>BuPONOP)(η<sup>2</sup>-H<sub>2</sub>)] [BAr<sup>F</sup><sub>4</sub>] was formed using an analogous method to that employed for **3** and **4**, with H<sub>2</sub> gas used as the reactant gas. The light orange solution turned yellow after 30 minutes stirring under 1 atm H<sub>2</sub>. NMR spectroscopy data were consistent with the literature,<sup>7</sup> obtaining 21 mg of [Rh(<sup>t</sup>BuPONOP)(η<sup>2</sup>-H<sub>2</sub>)] [BAr<sup>F</sup><sub>4</sub>] (76% yield).

### Crystallography

Single crystal X-ray diffraction data for complex **2** was collected on an Enraf-Nonius Kappa CCD diffractometer using Mo K<sub>α</sub> radiation (λ = 0.71073 Å) and data for complexes **3**, **4** and **5** were collected on an Agilent SuperNova diffractometer using graphite monochromated Cu K<sub>α</sub> radiation (λ = 1.54180 Å). Raw frame data were reduced using the DENZO-SMN package.<sup>8</sup> Intensity data were corrected using multi-scan method with SCALEPACK (within DENZO-SMN). The structures were solved using direct methods with SIR92<sup>9</sup> or SuperFlip<sup>10</sup> and refined using full-matrix least squares refinement on all F<sup>2</sup> data using the CRYSTALS program suite.<sup>11, 12</sup> Rotational disorder of some of the CF<sub>3</sub> groups of the [BAr<sup>F</sup><sub>4</sub>]<sup>-</sup> anion was treated by modelling the fluorine atoms over two sites and restraining their geometry.

**Table S-1** Selected crystallographic data for [Rh(<sup>t</sup>BuPONOP)]<sup>+</sup> complexes **2**, **3** and **4**

| Complex                                                     | <b>2</b>                                                                                           | <b>3</b>                                                                                         | <b>4</b>                                                                           |
|-------------------------------------------------------------|----------------------------------------------------------------------------------------------------|--------------------------------------------------------------------------------------------------|------------------------------------------------------------------------------------|
| Formula                                                     | C <sub>54</sub> H <sub>53</sub> BF <sub>24</sub> Cl <sub>2</sub> NO <sub>2</sub> P <sub>2</sub> Rh | C <sub>53</sub> H <sub>51</sub> BF <sub>24</sub> N <sub>3</sub> O <sub>2</sub> P <sub>2</sub> Rh | C <sub>54</sub> H <sub>51</sub> BF <sub>24</sub> NO <sub>3</sub> P <sub>2</sub> Rh |
| <i>M</i>                                                    | 1450.54                                                                                            | 1393.62                                                                                          | 1393.62                                                                            |
| Crystal system                                              | Monoclinic                                                                                         | Monoclinic                                                                                       | Monoclinic                                                                         |
| Space group                                                 | C 1 2/c 1                                                                                          | C 1 2/c 1                                                                                        | C 1 2/c 1                                                                          |
| <i>T</i> [K]                                                | 150 (2)                                                                                            | 150 (2)                                                                                          | 150 (2)                                                                            |
| <i>a</i> [Å]                                                | 16.9996 (5)                                                                                        | 16.8578 (4)                                                                                      | 16.8459 (2)                                                                        |
| <i>b</i> [Å]                                                | 18.1716 (4)                                                                                        | 18.1533 (3)                                                                                      | 18.1341 (2)                                                                        |
| <i>c</i> [Å]                                                | 39.8254 (10)                                                                                       | 39.7792 (7)                                                                                      | 39.7346 (7)                                                                        |
| $\alpha$ [deg]                                              | 90                                                                                                 | 90                                                                                               | 90                                                                                 |
| $\beta$ [deg]                                               | 96.458 (2)                                                                                         | 95.9972 (17)                                                                                     | 96.1653 (13)                                                                       |
| $\gamma$ [deg]                                              | 90                                                                                                 | 90                                                                                               | 90                                                                                 |
| <i>V</i> [Å <sup>3</sup> ]                                  | 12224.4 (5)                                                                                        | 12106.8 (4)                                                                                      | 12068.1 (3)                                                                        |
| <i>Z</i>                                                    | 8                                                                                                  | 8                                                                                                | 8                                                                                  |
| Density [g cm <sup>-3</sup> ]                               | 1.576                                                                                              | 1.529                                                                                            | 1.534                                                                              |
| $\mu$ [mm <sup>-1</sup> ]                                   | 0.533                                                                                              | 3.831                                                                                            | 3.847                                                                              |
| Reflns collected                                            | 38940                                                                                              | 42721                                                                                            | 43229                                                                              |
| <i>R</i> <sub>int</sub>                                     | 0.029                                                                                              | 0.031                                                                                            | 0.024                                                                              |
| No. of data/restr/param                                     | 15991/912/892                                                                                      | 12162/912/887                                                                                    | 12280/1140/910                                                                     |
| <i>R</i> <sub>1</sub> [ <i>I</i> > 2 $\sigma$ ( <i>I</i> )] | 0.0814                                                                                             | 0.0483                                                                                           | 0.0511                                                                             |
| <i>wR</i> <sub>2</sub> [all data]                           | 0.1692                                                                                             | 0.1183                                                                                           | 0.1211                                                                             |
| <i>GoF</i>                                                  | 0.9484                                                                                             | 1.0139                                                                                           | 1.0051                                                                             |
| CCDC number                                                 | 1044744                                                                                            | 1044745                                                                                          | 1044743                                                                            |

**Table S-2** Selected crystallographic data for [Rh(<sup>t</sup>BuPNP)]<sup>+</sup> complex **5**

| Complex                                            | 5*                                                                                                                                                        |
|----------------------------------------------------|-----------------------------------------------------------------------------------------------------------------------------------------------------------|
| Formula                                            | C <sub>56</sub> H <sub>57</sub> BF <sub>24</sub> Cl <sub>2</sub> NP <sub>2</sub> Rh:C <sub>55</sub> H <sub>56</sub> BF <sub>24</sub> CINP <sub>2</sub> Rh |
| <i>M</i>                                           | 1422.36                                                                                                                                                   |
| Crystal system                                     | Monoclinic                                                                                                                                                |
| Space group                                        | P 1 2 <sub>1</sub> /c 1                                                                                                                                   |
| <i>T</i> [K]                                       | 150 (2)                                                                                                                                                   |
| <i>a</i> [Å]                                       | 13.8327 (2)                                                                                                                                               |
| <i>b</i> [Å]                                       | 23.4907 (3)                                                                                                                                               |
| <i>c</i> [Å]                                       | 20.1051 (2)                                                                                                                                               |
| <i>α</i> [deg]                                     | 90                                                                                                                                                        |
| <i>β</i> [deg]                                     | 97.5982 (11)                                                                                                                                              |
| <i>γ</i> [deg]                                     | 90                                                                                                                                                        |
| <i>V</i> [Å <sup>3</sup> ]                         | 6475.59 (14)                                                                                                                                              |
| <i>Z</i>                                           | 2                                                                                                                                                         |
| Density [g cm <sup>-3</sup> ]                      | 1.459                                                                                                                                                     |
| <i>μ</i> [mm <sup>-1</sup> ]                       | 4.115                                                                                                                                                     |
| Reflns collected                                   | 26785                                                                                                                                                     |
| <i>R</i> <sub>int</sub>                            | 0.029                                                                                                                                                     |
| No. of data/restr/param                            | 12823/912/928                                                                                                                                             |
| <i>R</i> <sub>1</sub> [ <i>I</i> > 2σ( <i>I</i> )] | 0.1064                                                                                                                                                    |
| <i>wR</i> <sub>2</sub> [all data]                  | 0.2958                                                                                                                                                    |
| <i>GoF</i>                                         | 1.0109                                                                                                                                                    |
| CCDC number                                        | 1044741                                                                                                                                                   |

\* Formed as a mixture of **5** and [Rh(<sup>t</sup>BuPNP)(H)Cl][BAr<sup>F</sup><sub>4</sub>], **6**.

## References

1. A. B. Pangborn, M. A. Giardello, R. H. Grubbs, R. K. Rosen and F. J. Timmers, *Organometallics*, 1996, 15, 1518-1520.
2. W. E. Buschmann and J. S. Miller, *Inorg. Synth.*, 2002, 33, 83-91.
3. D. Hermann, M. Gandelman, H. Rozenberg, L. J. W. Shimon and D. Milstein, *Organometallics*, 2002, 21, 812-818.
4. W. H. Bernskoetter, C. K. Schauer, K. I. Goldberg and M. Brookhart, *Science*, 2009, 326, 553-556.
5. A. T. Lubben, J. S. McIndoe and A. S. Weller, *Organometallics*, 2008, 27, 3303-3306.
6. H. Aneetha, M. Jiménez-Tenorio, M. C. Puerta, P. Valerga and K. Mereiter, *Organometallics*, 2002, 21, 628-635.
7. M. Findlater, K. M. Schultz, W. H. Bernskoetter, A. Cartwright-Sykes, D. M. Heinekey and M. Brookhart, *Inorg. Chem.*, 2012, 51, 4672-4678.
8. Z. Otwinowski and W. Minor, *Methods Enzymol.*, 1997, 276, 307-326.
9. A. Altomare, G. Cascarano, C. Giacovazzo and A. Guagliardi, *J. Appl. Crystallogr.*, 1994, 27, 1045-1050.
10. L. Palatinus and G. Chapuis, *J. Appl. Crystallogr.*, 2007, 40, 786-790.
11. P. W. Betteridge, J. R. Carruthers, R. I. Cooper, K. Prout and D. J. Watkin, *J. Appl. Crystallogr.*, 2003, 36, 1487-1487.
12. R. I. Cooper, A. L. Thompson and D. J. Watkin, *J. Appl. Crystallogr.*, 2010, 43, 1100-1107.
